# Supplementary material for: Atomic-scale changes of silica-supported catalysts with nanocrystalline or amorphous gallia phases: implications of hydrogen pretreatment on their selectivity for propane dehydrogenation
Source: Royal Society of Chemistry journal article supplement (doi:10.1039/d2cy00074a), 2022-01-01
Supplement: d2cy00074a1.pdf [file d2cy00074a1.pdf]

## SUPPORTING INFORMATION

### Atomic-Scale Changes of Silica-Supported Catalysts with Nanocrystalline or Amorphous Gallia Phases: Implications of Hydrogen Pretreatment for their Selectivity for Propane Dehydrogenation

*Pedro Castro-Fernández,<sup>a</sup> Alexander I. Serykh,<sup>b</sup> Alexander V. Yakimov,<sup>c</sup> Igor P. Prosvirin,<sup>d</sup> Andrey V. Bukhtiyarov,<sup>d</sup> Paula M. Abdala,<sup>\*,a</sup> Christophe Copéret,<sup>b</sup> Alexey Fedorov,<sup>\*,a</sup> Christoph R. Müller<sup>\*,a</sup>*

<sup>a</sup> *Department of Mechanical and Process Engineering, ETH Zürich, CH-8092, Zürich, Switzerland*

<sup>b</sup> *Zelinsky Institute of Organic Chemistry, RAS, Moscow, 119991, Russia*

<sup>c</sup> *Department of Chemistry and Applied Biosciences, ETH Zürich, CH-8093, Zürich, Switzerland*

<sup>d</sup> *Borshakov Institute of Catalysis, SB RAS, 630090 Novosibirsk, Russia*

\* Corresponding authors. E-mails: [abdalap@ethz.ch](mailto:abdalap@ethz.ch); [fedoroval@ethz.ch](mailto:fedoroval@ethz.ch); [muelchri@ethz.ch](mailto:muelchri@ethz.ch)

## Figures

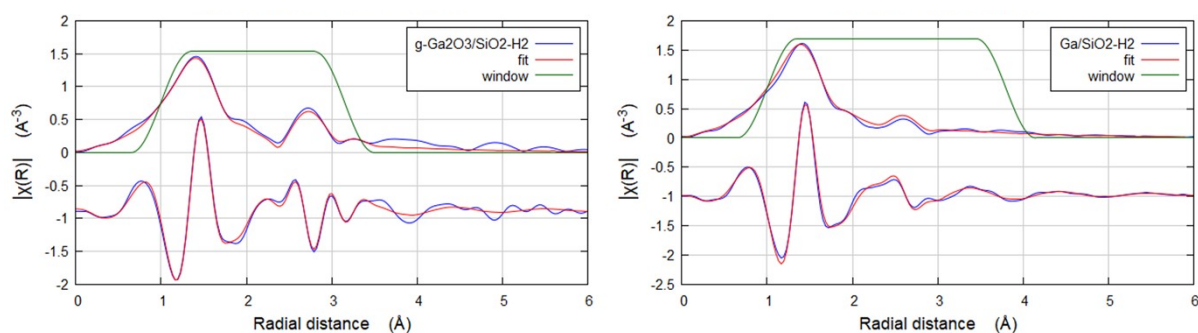

**Figure S1.** Results of EXAFS fittings for  $\gamma\text{-Ga}_2\text{O}_3/\text{SiO}_2\text{-H}_2$  and  $\text{Ga}/\text{SiO}_2\text{-H}_2$ .

Fitting results for  $\gamma\text{-Ga}_2\text{O}_3/\text{SiO}_2$  and  $\text{Ga}/\text{SiO}_2$  have been published in our previous work.<sup>1</sup>

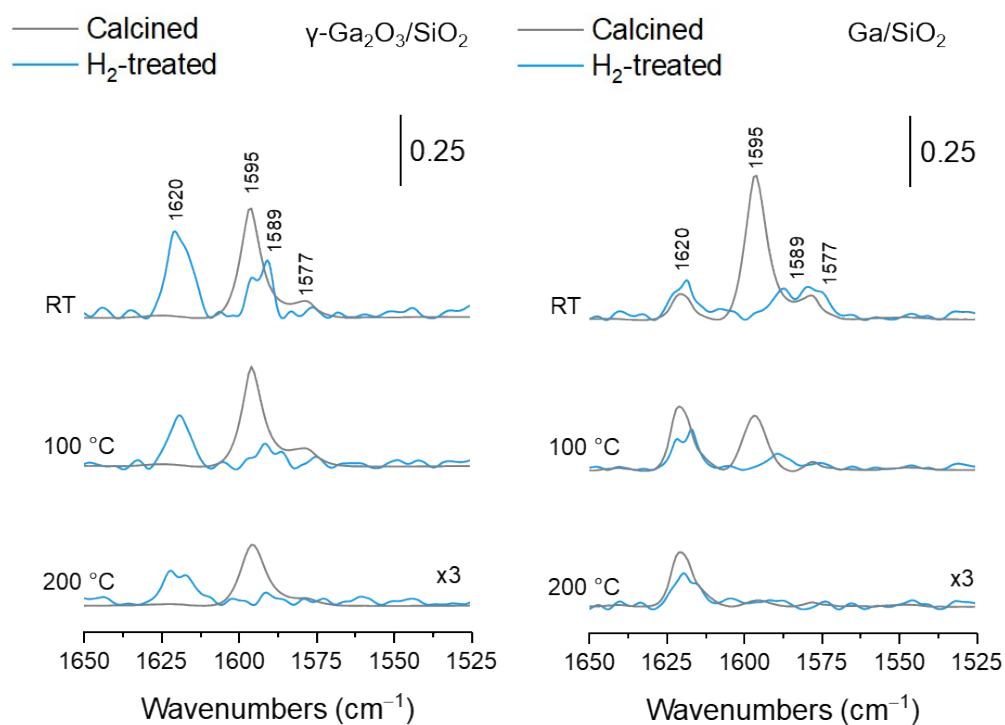

**Figure S2.** Py-FTIR results for calcined and  $\text{H}_2$ -treated materials evacuated under ca.  $10^{-5}$  mbar at RT, 100 and 200  $^\circ\text{C}$ .

Py-FTIR results for  $\gamma\text{-Ga}_2\text{O}_3/\text{SiO}_2$  and  $\text{Ga}/\text{SiO}_2$  have been published in our previous work.<sup>1</sup>

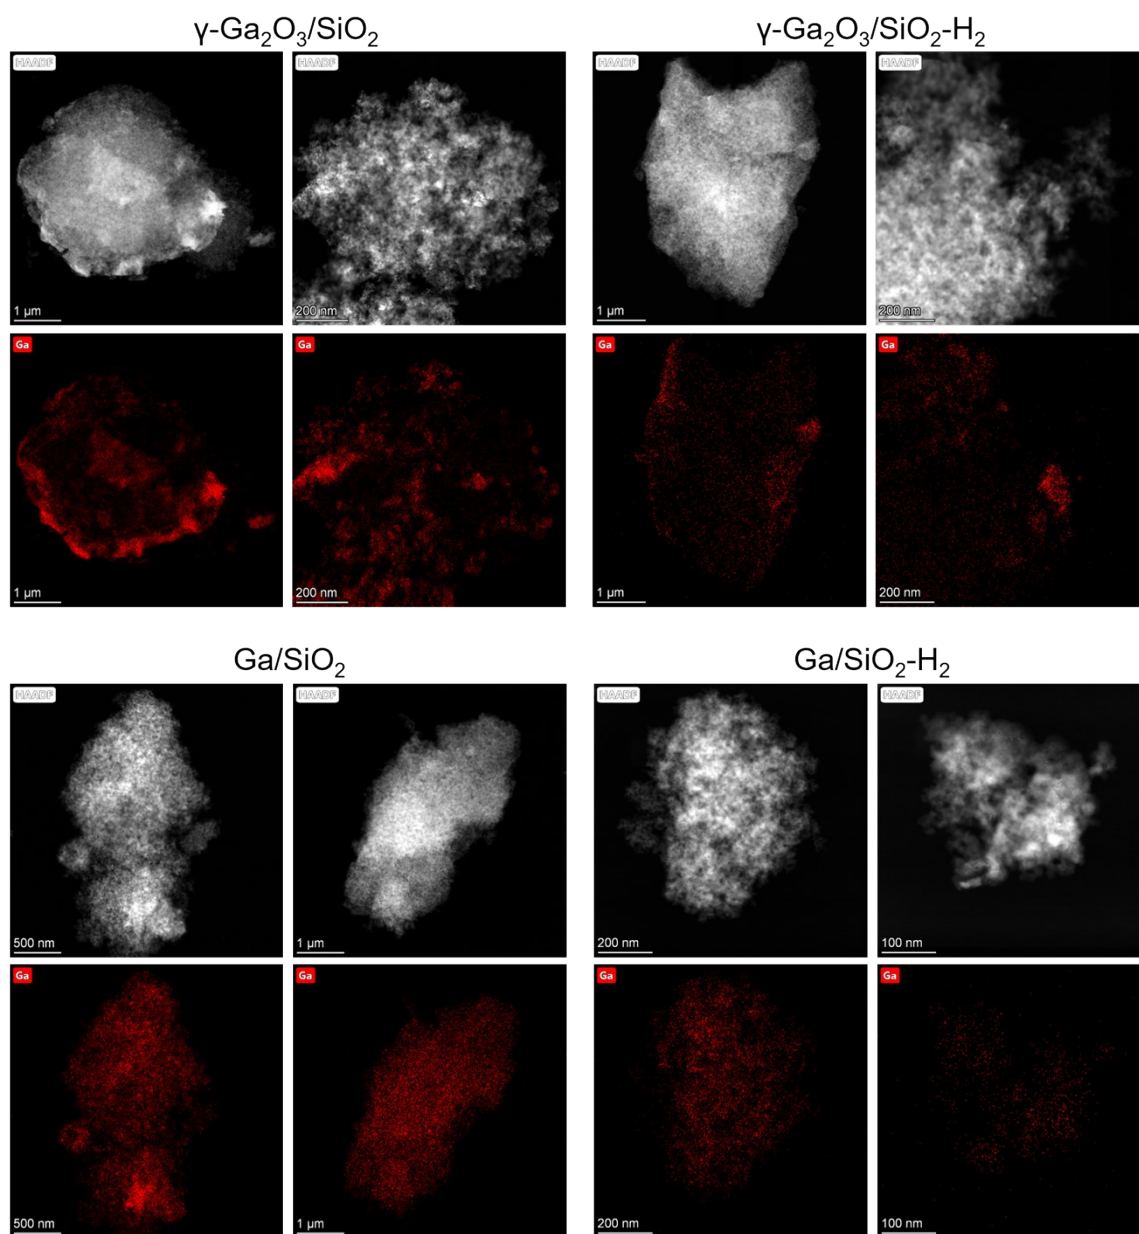

**Figure S3.** STEM-EDX images of calcined and  $\text{H}_2$ -treated catalysts.

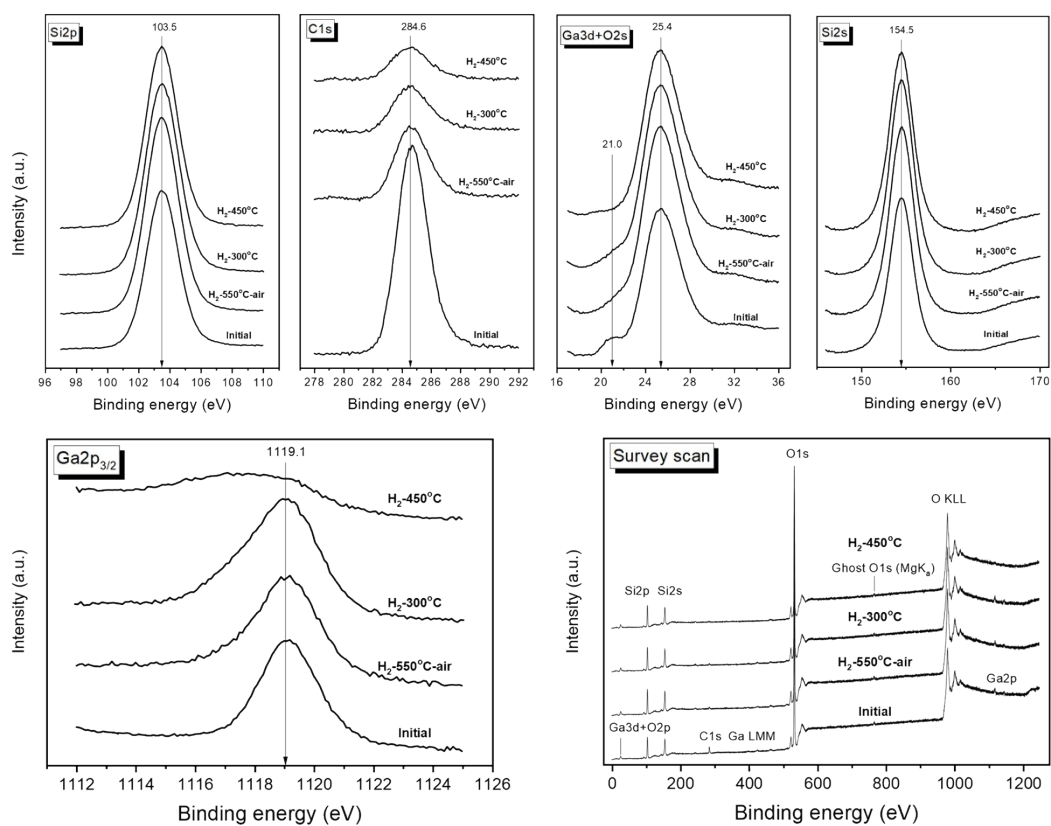

**Figure S4.** XPS Si2p, C1s, Ga3d, O2s, Si2s, Ga2p<sub>3/2</sub> and survey spectra of  $\gamma$ -Ga<sub>2</sub>O<sub>3</sub>/SiO<sub>2</sub>. XPS spectra were acquired on calcined materials (initial), after treating them in a reactor under H<sub>2</sub> flow at 550 °C (H<sub>2</sub>-550 °C) followed by the exposure to air during material transfer, and reduced in situ at 300 °C and 450 °C in the pretreatment chamber of the XPS instrument (labelled H<sub>2</sub>-300 °C and H<sub>2</sub>-450 °C, respectively).

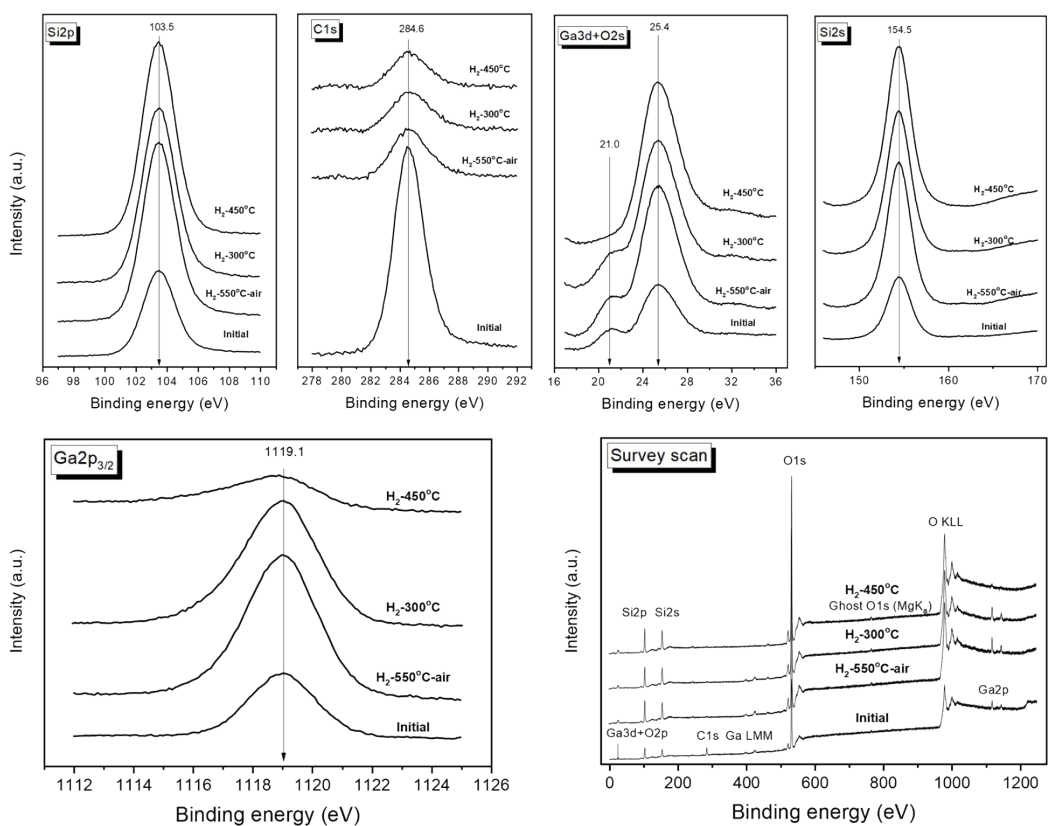

**Figure S5.** XPS Si2p, C1s, Ga3d, O2s, Si2s, Ga2p<sub>3/2</sub> and survey spectra of Ga/SiO<sub>2</sub>. XPS spectra were acquired on calcined materials (initial), after treating them in a reactor under H<sub>2</sub> flow at 550 °C (H<sub>2</sub>-550 °C) followed by the exposure to air during material transfer, and reduced in situ at 300 °C and 450 °C in the pretreatment chamber of the XPS instrument (labelled H<sub>2</sub>-300 °C and H<sub>2</sub>-450 °C, respectively).

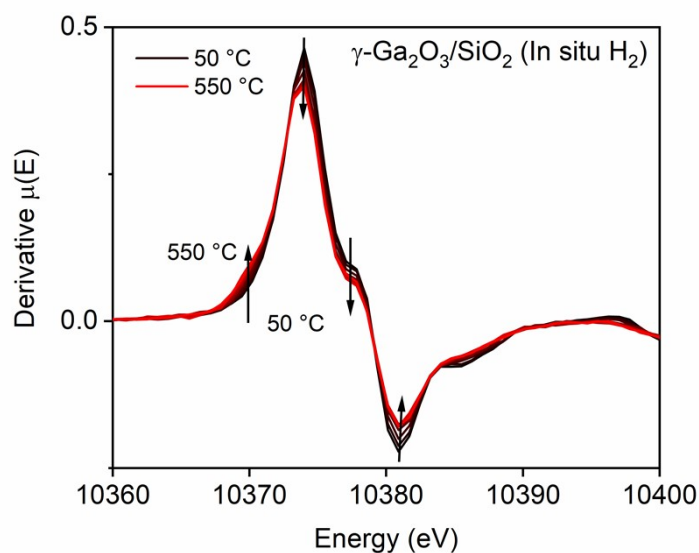

**Figure S6.** In situ Ga K-edge XANES derivative plot during H<sub>2</sub> treatment of  $\gamma$ -Ga<sub>2</sub>O<sub>3</sub>/SiO<sub>2</sub> (50-550 °C). Arrows indicate gradual changes in intensities at increasing temperatures.

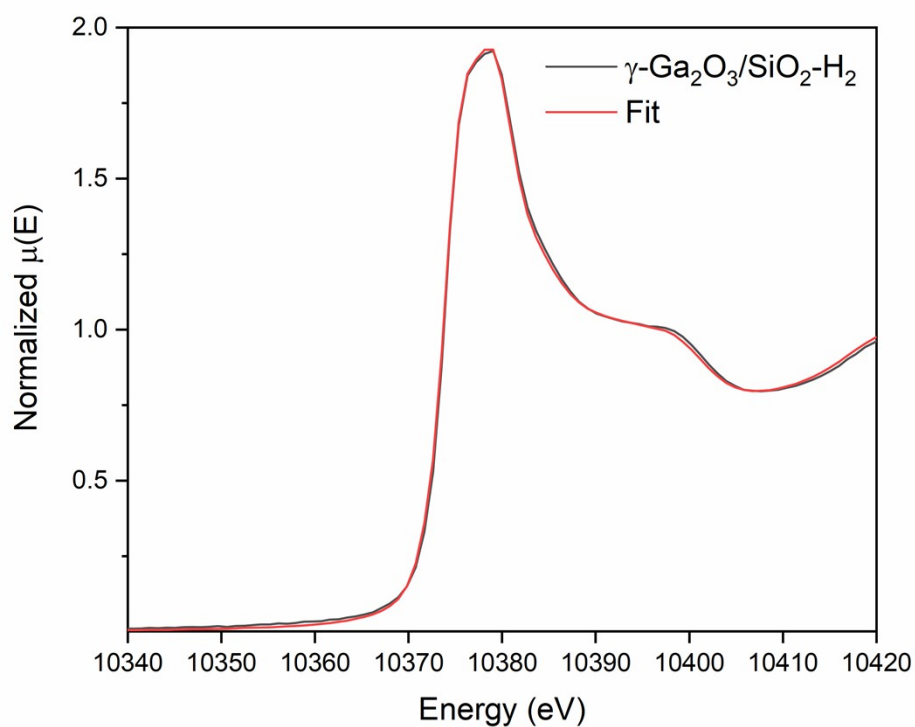

**Figure S7.** Linear combination fitting analysis results of Ga K-edge XANES from  $\gamma$ -Ga<sub>2</sub>O<sub>3</sub>/SiO<sub>2</sub>-H<sub>2</sub> using  $\gamma$ -Ga<sub>2</sub>O<sub>3</sub>/SiO<sub>2</sub> and Ga/SiO<sub>2</sub> as components. Fitting results gave a 52% fraction of  $\gamma$ -Ga<sub>2</sub>O<sub>3</sub>/SiO<sub>2</sub> and 48% fraction of Ga/SiO<sub>2</sub>-H<sub>2</sub> in  $\gamma$ -Ga<sub>2</sub>O<sub>3</sub>/SiO<sub>2</sub>-H<sub>2</sub>.

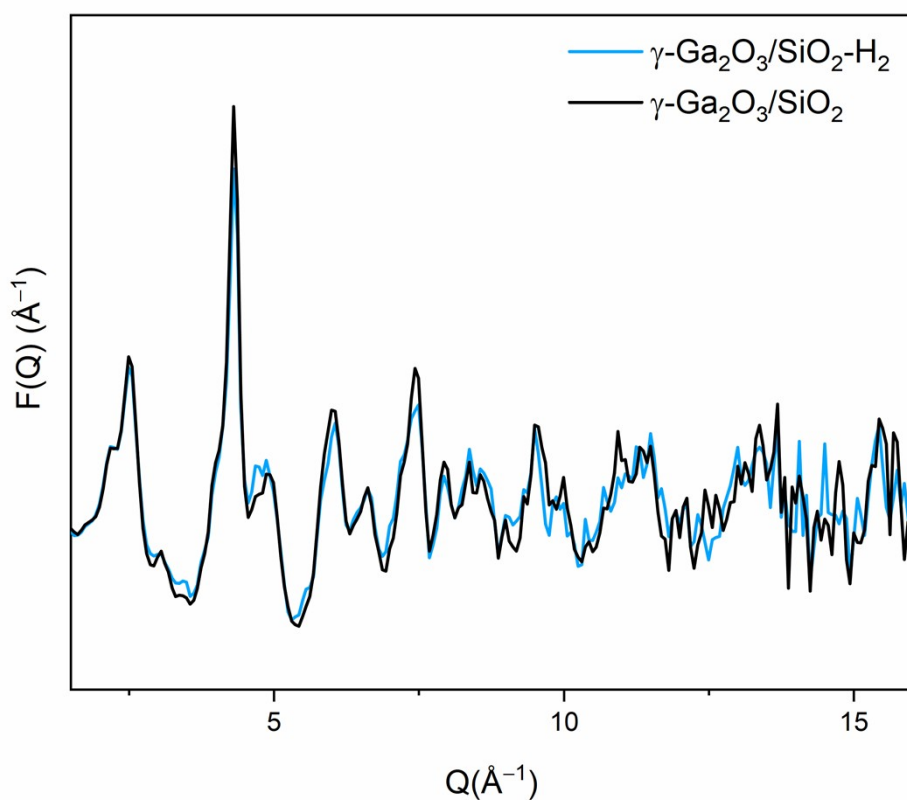

**Figure S8.** In situ reduced structure function plots for  $\gamma$ -Ga<sub>2</sub>O<sub>3</sub>/SiO<sub>2</sub>-H<sub>2</sub> and  $\gamma$ -Ga<sub>2</sub>O<sub>3</sub>/SiO<sub>2</sub>.

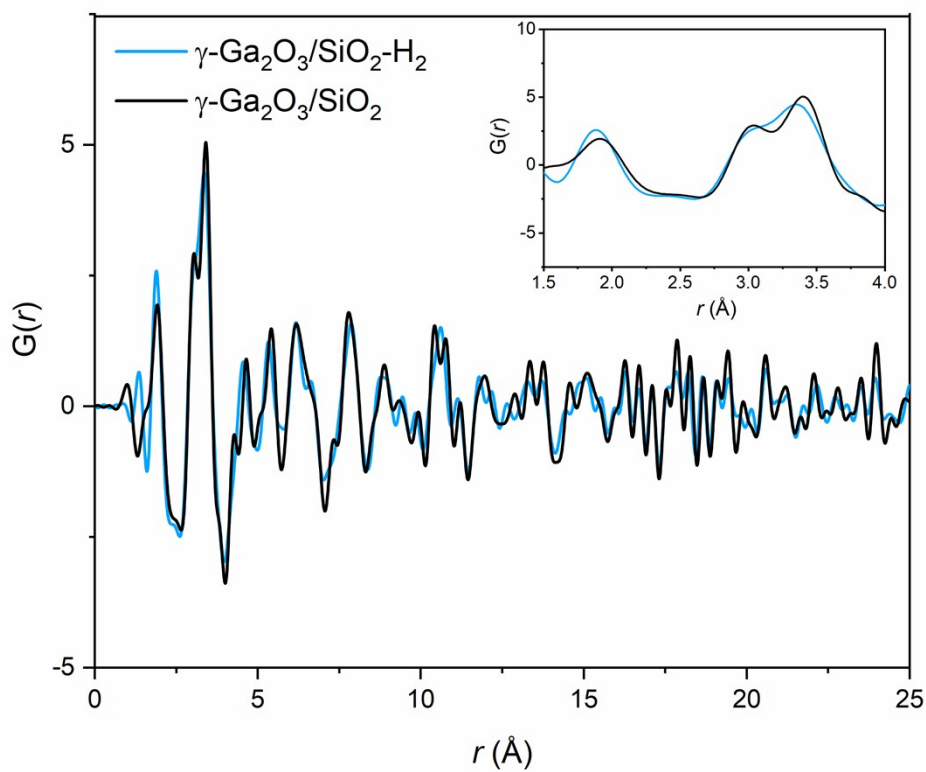

**Figure S9.** In situ pair distribution function plots comparing  $\gamma\text{-Ga}_2\text{O}_3/\text{SiO}_2\text{-H}_2$  and  $\gamma\text{-Ga}_2\text{O}_3/\text{SiO}_2$ . The inset shows detail of the ca. 1.6-4 Å range, mainly influenced by the local structure.

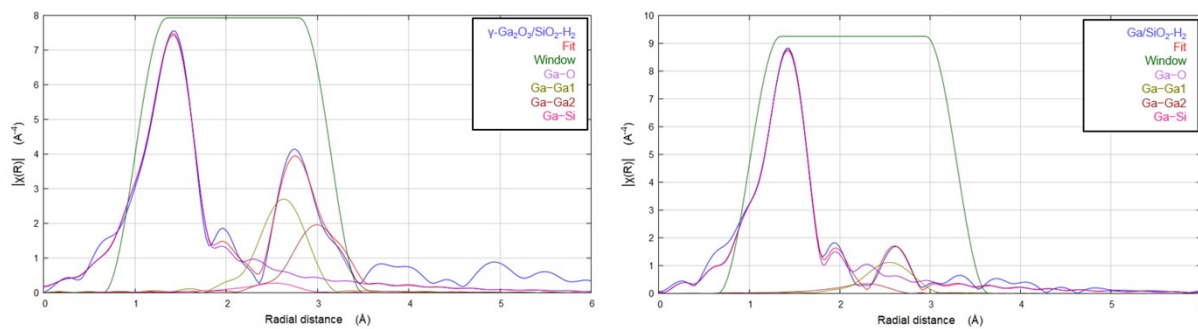

**Figure S10.** EXAFS fittings of  $\gamma\text{-Ga}_2\text{O}_3/\text{SiO}_2\text{-H}_2$  (left) and  $\text{Ga}/\text{SiO}_2\text{-H}_2$  (right) including Ga-O, Ga-Ga and Ga-Si paths.

## Tables

**Table S1.**  $^{15}\text{N}$  DNP SENS experimental parameters.

| Material                                    | Desorption T<br>( $^{\circ}\text{C}$ ) | $E_{\text{solv}}^{\text{a}}$ | DNP buildup<br>time <sup>b</sup> (sec) | Measurement<br>time (h) | Number of scans |
|---------------------------------------------|----------------------------------------|------------------------------|----------------------------------------|-------------------------|-----------------|
| $\gamma\text{-Ga}_2\text{O}_3/\text{SiO}_2$ | 150                                    | 109                          | 7.7                                    | 9.9                     | 11896           |
| Ga/SiO <sub>2</sub>                         |                                        | 52                           | 7.1                                    | 11.1                    | 13368           |

<sup>a</sup> measured from the comparison between  $^1\text{H}$  NMR signals of TCE in the spectra with MW ON and OFF

<sup>b</sup>  $T_1$  relaxation times measured from saturation-recovery experiments with MW ON

**Table S2.** Results of EXAFS fittings including Ga–Si paths.

| Material                                               | Path  | CN     | Distance ( $\text{\AA}$ ) | $\sigma^2$ ( $\text{\AA}^2$ ) | R-factor |
|--------------------------------------------------------|-------|--------|---------------------------|-------------------------------|----------|
| $\gamma\text{-Ga}_2\text{O}_3/\text{SiO}_2\text{-H}_2$ | Ga–O  | 5.2(2) | 1.87(1)                   | 0.011*                        | 0.002    |
|                                                        | Ga–Ga | 3.4(7) | 2.99(1)                   | 0.012*                        |          |
|                                                        | Ga–Ga | 2.7(7) | 3.36(1)                   | 0.012*                        |          |
|                                                        | Ga–Si | 1.0(7) | 3.06(7)                   | 0.012*                        |          |
| Ga/SiO <sub>2</sub> -H <sub>2</sub>                    | Ga–O  | 4.7(1) | 1.86(1)                   | 0.008*                        | 0.003    |
|                                                        | Ga–Si | 0.5(1) | 2.80(7)                   | 0.013*                        |          |
|                                                        | Ga–Ga | 1.3(3) | 2.91(2)                   | 0.013*                        |          |

**Table S3.** Results of EXAFS fittings obtained when varying both the  $\sigma^2$  factors and CN.

| Material                                               | Path               | CN     | Distance ( $\text{\AA}$ ) | $\sigma^2$ ( $\text{\AA}^2$ ) | R-factor |
|--------------------------------------------------------|--------------------|--------|---------------------------|-------------------------------|----------|
| $\gamma\text{-Ga}_2\text{O}_3/\text{SiO}_2\text{-H}_2$ | Ga–O               | 5.5(5) | 1.87(1)                   | 0.011(1)                      | 0.004    |
|                                                        | Ga–Ga <sub>1</sub> | 3(3)   | 2.99(3)                   | 0.012(7)                      |          |
|                                                        | Ga–Ga <sub>2</sub> | 3(3)   | 3.37(3)                   | 0.012(7)                      |          |
| Ga/SiO <sub>2</sub> -H <sub>2</sub>                    | Ga–O               | 4.7(3) | 1.86(1)                   | 0.008(1)                      | 0.004    |
|                                                        | Ga–Ga              | 1.1(5) | 2.92(1)                   | 0.011(3)                      |          |



**Table S4.** Results of EXAFS fittings obtained when varying the  $\sigma^2$  factors while fixing CN (to the values obtained for the calcined state).

| Material                                                                   | Path               | CN   | Distance (Å) | $\sigma^2$ (Å <sup>2</sup> ) | R-factor |
|----------------------------------------------------------------------------|--------------------|------|--------------|------------------------------|----------|
| $\gamma$ -Ga <sub>2</sub> O <sub>3</sub> /SiO <sub>2</sub> -H <sub>2</sub> | Ga–O               | 5.4* | 1.87(1)      | 0.011(1)                     | 0.004    |
|                                                                            | Ga–Ga <sub>1</sub> | 2*   | 2.99(3)      | 0.011(1)                     |          |
|                                                                            | Ga–Ga <sub>2</sub> | 3*   | 3.37(3)      | 0.011(1)                     |          |
| Ga/SiO <sub>2</sub> -H <sub>2</sub>                                        | Ga–O               | 5.7* | 1.85(1)      | 0.010(1)                     | 0.012    |
|                                                                            | Ga–Ga              | 2.0* | 2.92(2)      | 0.015(2)                     |          |

## References

- 1 P. Castro-Fernández, D. Mance, C. Liu, I. B. Moroz, P. M. Abdala, E. A. Pidko, C. Copéret, A. Fedorov, C. R. Müller, *ACS Catal.*, 2021, **11**, 907–924.
